# Supplementary material for: Latent feature extraction with a prior-based self-attention framework for spatial transcriptomics
Source: HighWire-hosted journal article supplement (doi:10.1101/gr.277891.123), 2023-10-01
Supplement: Supplemental_Table_S1.xlsx [file Supplemental_Table_S1.xlsx]

## Sheet: Table S1
	Table S1. Quantitative evaluation of PAST and other methods on the STARmap MPVC dataset. Cross validation: 5-fold cross-validation experiments where the latent embeddings were taken as input, the ground-truth labels were taken as output and a support vector machine with default parameters was taken as classifier. Ncluster: spatial clustering with a specified number of clusters. Dlouvain: spatial …
	Scenario	Metrics	Scanpy	Seurat	SpaGCN	CCST	DR-SC	NSF	SpatialPCA	STAGATE	PAST-S	PAST-E-Visium	PAST-E-scRNA
	Cross validation	Acc	0.664504	0.665327	0.65374	-	0.627245	0.695933	0.811138	0.74243	0.784651	0.753945	0.73076
		K	0.597108	0.596979	0.584983	-	0.552563	0.635202	0.774391	0.691217	0.741845	0.705464	0.675866
		mF1	0.625415	0.621971	0.555776	-	0.564371	0.646318	0.797393	0.715478	0.753606	0.742158	0.664622
		wF1	0.658032	0.658093	0.639326	-	0.620912	0.688756	0.808593	0.738241	0.777565	0.750666	0.719539
	Ncluster	ARI	0.296019	0.288395	0.34772	0.502909	0.30126	0.295029	0.49949	0.388048	0.563983	0.553011	0.532711
		AMI	0.317041	0.298495	0.38424	0.542211	0.32671	0.323753	0.5804	0.469969	0.642573	0.61683	0.571039
		NMI	0.322637	0.304142	0.389163	0.546115	0.332094	0.329292	0.58389	0.474425	0.645603	0.620107	0.574542
		FMI	0.412885	0.403206	0.450522	0.591028	0.411881	0.411877	0.584784	0.495503	0.643635	0.633902	0.610323
		Comp	0.325783	0.303226	0.385595	0.565015	0.329179	0.332562	0.595306	0.4877	0.670272	0.644307	0.579362
		Homo	0.319551	0.305063	0.392797	0.528439	0.335061	0.326085	0.572904	0.461854	0.622686	0.59766	0.569802
	Dlouvain	ARI	0.303039	0.290813	0.3422	-	0.240912	0.277999	0.480354	0.346993	0.502213	0.384176	0.44525
		AMI	0.31653	0.301224	0.383077	-	0.303085	0.331349	0.559401	0.384187	0.606544	0.493139	0.507498
		NMI	0.322026	0.306844	0.388727	-	0.31159	0.340948	0.563397	0.389096	0.610203	0.497934	0.512009
		FMI	0.415336	0.40476	0.443666	-	0.346708	0.37754	0.55972	0.449201	0.580482	0.483547	0.531263
		Comp	0.320804	0.305624	0.376981	-	0.282674	0.301583	0.542466	0.384586	0.597424	0.49293	0.496671
		Homo	0.323258	0.308074	0.401228	-	0.347097	0.392133	0.586009	0.393713	0.62354	0.503042	0.528323
