# Supplementary material for: Latent feature extraction with a prior-based self-attention framework for spatial transcriptomics
Source: HighWire-hosted journal article supplement (doi:10.1101/gr.277891.123), 2023-10-01
Supplement: Supplemental_Table_S4.xlsx [file Supplemental_Table_S4.xlsx]

## Sheet: Table S4
	Table S4. Quantitative evaluation of PAST and other methods on the Stereo-seq MOBS1 dataset. Cross validation: 5-fold cross-validation experiments where the latent embeddings were taken as input, the ground-truth labels were taken as output and a support vector machine with default parameters was taken as classifier. Ncluster: spatial clustering with a specified number of clusters. Dlouvain: spat…
	Scenario	Metrics	Scanpy	STAGATE	PAST-S	PAST-E
	Cross validation	Acc	0.455724	0.606865	0.738661	0.72694
		K	0.363058	0.548368	0.701229	0.687569
		mF1	0.382469	0.513009	0.704016	0.700123
		wF1	0.423176	0.580058	0.734908	0.723418
	Ncluster	ARI	0.0733334	0.345488	0.35035	0.41343
		AMI	0.117896	0.485314	0.502554	0.511167
		NMI	0.118122	0.485442	0.502678	0.51129
		FMI	0.197367	0.422749	0.427623	0.484051
		Comp	0.120976	0.480001	0.498539	0.511234
		Homo	0.1154	0.491007	0.506886	0.511346
	Dlouvain	ARI	0.0606503	0.132102	0.333668	0.278455
		AMI	0.0931433	0.394689	0.481484	0.444189
		NMI	0.0937445	0.395067	0.48163	0.444345
		FMI	0.138358	0.217461	0.407248	0.356259
		Comp	0.078447	0.32379	0.459594	0.419884
		Homo	0.116453	0.50658	0.505887	0.471832
