# Supplementary material for: Latent feature extraction with a prior-based self-attention framework for spatial transcriptomics
Source: HighWire-hosted journal article supplement (doi:10.1101/gr.277891.123), 2023-10-01
Supplement: Supplemental_Table_S5.xlsx [file Supplemental_Table_S5.xlsx]

## Sheet: Table S5
	Table S5. The maxMAP, maxSC and maxCHS for PAST with different kinds of reference on multiple target datasets. For each target dataset, we apply PAST with different kinds of reference and obtain corresponding recommendation scores, i.e., maxMAP, maxSC and maxCHS. The higher the recommendation scores, the more recommended this type of reference data is.
	Target dataset	Reference type	maxMAP	maxSC	maxCHS
	STARmap MPVC dataset	PAST-S	0.932	0.195	223.705
		PAST-E-Visium	0.872	0.118	197.576
		PAST-E-scRNA	0.861	0.107	156.095
	10x Visium human DLPFC dataset	PAST-S	0.918	0.148	650.646
		PAST-E-Visium	0.928	0.196	1298.41
		PAST-E-Stereo	0.771	0.044	283.113
		PAST-E-scRNA	0.772	0.038	286.404
	osmFISH MSC dataset	PAST-S	0.915	0.122	599.333
		PAST-E-Stereo	0.887	0.107	477.103
		PAST-E-scRNA	0.86	0.088	376.456
	Stereo-seq MOB dataset	PAST-S	0.896	0.098	10434.1
		PAST-E-Stereo	0.894	0.101	13757.2
		PAST-E-Visium	0.853	0.078	10477.5
		PAST-E-scRNA	0.841	0.065	9538.09
