# Supplementary material for: Latent feature extraction with a prior-based self-attention framework for spatial transcriptomics
Source: HighWire-hosted journal article supplement (doi:10.1101/gr.277891.123), 2023-10-01
Supplement: Supplemental_Table_S6.xlsx [file Supplemental_Table_S6.xlsx]

## Sheet: Table S6
	Table S6. The computational time of maxMAP, maxSC and maxCHS for PAST with different kinds of reference on multiple target datasets. For each target dataset, we record the computational time in seconds of different recommendation scores.
	Target dataset	Reference type	maxMAP	maxSC	maxCHS
	STARmap MPVC dataset	PAST-S	0.635 s	0.321 s	0.007 s
		PAST-E-Visium	0.354 s	0.293 s	0.007 s
		PAST-E-scRNA	0.379 s	0.111 s	0.007 s
	10x Visium human DLPFC dataset	PAST-S	9.678 s	28.884 s	0.156 s
		PAST-E-Visium	9.168 s	28.74 s	0.132 s
		PAST-E-Stereo	9.252 s	28.404 s	0.144 s
		PAST-E-scRNA	9.36 s	30.372 s	0.18 s
	osmFISH MSC dataset	PAST-S	0.873 s	2.68 s	0.013 s
		PAST-E-Stereo	0.859 s	2.573 s	0.012 s
		PAST-E-scRNA	0.882 s	2.711 s	0.013 s
	Stereo-seq MOB dataset	PAST-S	59.833 s	870.566 s	0.602 s
		PAST-E-Stereo	58.315 s	854.022 s	0.61 s
		PAST-E-Visium	58.297 s	862.188 s	0.579 s
		PAST-E-scRNA	59.879 s	858.725 s	0.57 s
