# Supplementary material for: Latent feature extraction with a prior-based self-attention framework for spatial transcriptomics
Source: HighWire-hosted journal article supplement (doi:10.1101/gr.277891.123), 2023-10-01
Supplement: Supplemental_Table_S7.xlsx [file Supplemental_Table_S7.xlsx]

## Sheet: Table S7
	Table S7. The detailed model structure and hyper-parameters of PAST. We describe the model structure and corresponding parameter settings in (module name, output dimension) format. Specially, the parameter settings of self-attention module are of (module name, output dimension of [Q, K, V]) format. BNN: Bayesian neural network, FCN: fully-connected network, SA: self-attention module. We utilized …
	Encoder	(Input target gene expression matrix, D)
		(BNN, d*4/5) and (FCN, d/5)
		(Concatenation, d)
		(SA, [d, d, d])×2
	Gaussian distribution	(FCN, d) and (FCN, d)
		Reparameterization trick, d
	Decoder	(SA, [d, d, d])×2
		(FCN, D)
		(Reconstructed target gene expression matrix, D)
