# Supplementary material for: Latent feature extraction with a prior-based self-attention framework for spatial transcriptomics
Source: HighWire-hosted journal article supplement (doi:10.1101/gr.277891.123), 2023-10-01
Supplement: Supplemental_Table_S8.xlsx [file Supplemental_Table_S8.xlsx]

## Sheet: Table S8
	Table S8. Summary of datasets used in this study. We collected multiple datasets generated by different technologies and the corresponding external reference datasets.
	Dataset	Spots	Genes	Regions	Technology	Resolution
	Human DLPFC 151507	4221	33538	7	10x Visium	Non single-cell
	Human DLPFC 151508	4381	33538	7	10x Visium	Non single-cell
	Human DLPFC 151509	4788	33538	7	10x Visium	Non single-cell
	Human DLPFC 151510	4595	33538	7	10x Visium	Non single-cell
	Human DLPFC 151669	3636	33538	5	10x Visium	Non single-cell
	Human DLPFC 151670	3484	33538	5	10x Visium	Non single-cell
	Human DLPFC 151671	4093	33538	5	10x Visium	Non single-cell
	Human DLPFC 151672	3888	33538	5	10x Visium	Non single-cell
	Human DLPFC 151673	3611	33538	7	10x Visium	Non single-cell
	Human DLPFC 151674	3635	33538	7	10x Visium	Non single-cell
	Human DLPFC 151675	3566	33538	7	10x Visium	Non single-cell
	Human DLPFC 151676	3431	33538	7	10x Visium	Non single-cell
	Mouse primary visual cortex	1207	1020	7	STARmap	Single-cell
	Mouse somatosensory cortex	4839	33	11	osmFISH	Single-cell
	Mouse olfactory bulb section1	107416	26145	12	Stereo-seq	Single-cell
	Mouse olfactory bulb section2	104931	23815	11	Stereo-seq	Single-cell
	Human breast cancer section1	3798	36601	20	10x Visium	Non single-cell
	Human breast cancer section2	3987	36601	NA	10x Visium	Non single-cell
	Axclotl brain section 1	8738	26071	18	Stereo-seq	Single-cell
	Axclotl brain section 2	8192	26071	17	Stereo-seq	Single-cell
	Axclotl brain section 3	7668	26071	18	Stereo-seq	Single-cell
	Zebrafish embryo	18948	16733	4	Stereo-seq	Single-cell
	Mouse brain coronal	2688	18078	15	10x Visium	Non single-cell
	Mouse brain	38764	26177	20	Stereo-seq	Single-cell
	Mouse primary visual cortex	14249	34617	23	scRNA-seq	Single-cell
